1 **Transcriptional variability accelerates pre-leukemia by cell diversification and**  
2 **perturbation of protein synthesis**

3

4 Short title: **Loss of Kat2a accelerates pre-leukemia**

5

6 One-sentence summary: **Loss of Kat2a enhances transcriptional variability of ribosome**  
7 **biosynthetic programs and transiently accelerates pre-leukemia**

8

9 Shikha Gupta<sup>1,2</sup>, Oliver M. Dovey<sup>3#</sup>, Ana Filipa Domingues<sup>2,4</sup>, Oliwia W. Cyran<sup>2</sup>, Caitlin M.  
10 Cash<sup>5</sup>, George Giotopoulos<sup>2,4</sup>, Justyna Rak<sup>2,4</sup>, Jonathan Cooper<sup>2,3,4</sup>, Malgorzata Gozdecka<sup>2,4</sup>,  
11 Ryan J. Asby<sup>2,4</sup>, Noor Al-Jabery<sup>5</sup>, Victor Hernandez-Hernandez<sup>5,6</sup>,  
12 Sudhakaran Prabakaran<sup>1,7¶</sup>, Brian J. Huntly<sup>2,4</sup>, George S. Vassiliou<sup>2,3,4</sup>, Cristina Pina<sup>5,6\*</sup>

13

14 <sup>1</sup>Department of Genetics, University of Cambridge, UK; <sup>2</sup>Department of Haematology,  
15 University of Cambridge, UK; <sup>3</sup>Wellcome Sanger Institute, Wellcome Trust Genome  
16 Campus, UK; <sup>4</sup>Wellcome Trust-MRC Cambridge Stem Cell Institute, University of  
17 Cambridge, UK; <sup>5</sup>College of Health, Medicine and Life Sciences - Division of Biosciences,  
18 Brunel University London, UK; <sup>6</sup>Centre for Genome Engineering and Maintenance, Brunel  
19 University London, Uxbridge, UB8 3PH, UK; <sup>7</sup>NonExomics, Inc., USA \*corresponding  
20 author ([cristina.pina@brunel.ac.uk](mailto:cristina.pina@brunel.ac.uk))

21 <sup>#</sup>Current address: Bit.Bio; Babraham Research Campus; Cambridge, CB22 3FH; UK

22 <sup>¶</sup>Current address: NonExomics, Inc., 2 Simon Willard Rd, Acton, MA 01720, USA

23

24

25 **Abstract: Transcriptional variability facilitates stochastic cell diversification and can in**  
26 **turn underpin adaptation to stress or injury. We hypothesize that it may analogously**  
27 **facilitate progression of pre-malignancy to cancer. To investigate this, we initiated pre-**  
28 **leukemia in mouse cells with enhanced transcriptional variability due to conditional**  
29 **disruption of the histone lysine acetyltransferase gene *Kat2a*. By combining single-cell**  
30 **RNA-sequencing of pre-leukemia with functional analysis of transformation, we show**  
31 **that *Kat2a* loss results in global variegation of cell identity and accumulation of pre-**  
32 **leukemic cells. Leukemia progression is subsequently facilitated by destabilization of**  
33 **ribosome biogenesis and protein synthesis, which confer a transient transformation**  
34 **advantage. The contribution of transcriptional variability to early cancer evolution**

35 **reflects a generic role in promoting cell fate transitions, which, in the case of well-**  
36 **adapted malignancies, contrastingly differentiates and depletes cancer stem cells. In**  
37 **other words, transcriptional variability confers forward momentum to cell fate systems,**  
38 **with differential multi-stage impact throughout cancer evolution.**

39

40 Tumors evolve by genetic drift and natural selection <sup>1,2</sup>. Acquisition of new mutations confers  
41 a probability of adaptation to new environmental pressures <sup>3</sup>, and facilitates progression and  
42 transformation of pre-malignant lesions, promotes metastasis and drives treatment resistance  
43 <sup>4</sup>. In recent years, it became apparent that non-genetic instability, in particular variability in  
44 methylation epialleles, can confer adaptive advantages to tumor growth and survival  
45 irrespective of mutations, and function as drivers of therapy resistance and disease relapse in  
46 hematological malignancies <sup>5,6</sup>. Hematological malignancies, and in particular Acute Myeloid  
47 Leukemia (AML), are strongly dependent on epigenetic regulation, both through mutation of  
48 chromatin factors, and by co-option of unmutated chromatin regulators into maintenance of  
49 leukemogenic programs <sup>7-9</sup>. Notably, AML has lower levels of mutations than solid tumors,  
50 supporting the notion that non-genetic events may be especially important in the former  
51 <sup>7</sup>. Akin to genetic instability, epigenetic variability is increased in leukemia initiation and  
52 relapse, but low in leukemia maintenance <sup>10,11</sup>, suggesting that reconfiguration of  
53 molecular/transcriptional programs may perturb the identity or survival of well-adapted  
54 leukemia cells by disrupting pro-oncogenic molecular signatures. We have recently captured  
55 this phenomenon upon loss of KAT2A, a histone acetyltransferase that promotes gene  
56 transcription through activation of promoter bursting and stabilization of gene expression  
57 levels. *Kat2a* loss (NULL) results in enhanced cell-to-cell transcriptional variability and  
58 progressive loss of leukemia stem cells (LSC) transformed with the *KMT2A-MLLT3* (*MLL-*  
59 *AF9*) gene fusion <sup>12</sup>. Accordingly, KAT2A is required for maintenance of AML cell lines and  
60 *in vitro* self-renewal of patient AML blasts <sup>13</sup>. At a cellular level, loss of *Kat2a* results in  
61 perturbation of leukemia lineage trajectories, with emergence of multiple incongruent  
62 differentiation pathways that deplete LSC, but fail to uniformly differentiate leukemia cells  
63 <sup>12</sup>. A similar pattern of incongruous exit from the stem cell state was observed upon KAT2A  
64 inhibition in mouse embryonic stem (ES) cells <sup>14</sup>. *MLL-AF9* results in an  
65 aggressive leukemia, both in mice and in humans, and requires minimal cooperativity from  
66 additional mutational events <sup>7,15</sup>. As such, it provides a good representation of a well-adapted  
67 leukemia, with minimal genetic and epigenetic variability. However, it does not reflect what  
68 is observed with more common forms of AML such as those associated with *RUNXI-*

69 *RUNX1T1* (*AML1-ETO*), where progression in mouse models is slow and infrequent<sup>7,16</sup>, or  
70 clonal hematopoiesis, in which the associated mutations (e.g. in *IDH1/2*, *TET2*, *DNMT3A*)  
71 convey a self-renewal advantage, but require additional genetic events for leukemia<sup>7,16</sup>. In  
72 these cases, we postulate that malignant progression may be facilitated by non-genetic  
73 instability, which can be promoted through loss of *Kat2a*.

74

75 To test our hypothesis, we made use of 2 pre-leukemia mouse models: *Idh1*<sup>R132H</sup> and *RUNX1-*  
76 *RUNX1T1*(*RT1(9a)*). First, we developed a new inducible *Idh1*<sup>R132H</sup> allele (Fig. S1a-c, and  
77 Supplementary Methods), and crossed it into an *Mx1-Cre* background (Fig. S1d), to activate  
78 the mutation in hematopoietic tissues. We verified the functionality of the *Idh1*<sup>R132H</sup> allele by  
79 accumulation of the onco-metabolite 2-HG (Fig. S1e-f). *Idh1*<sup>R132H</sup> mice develop  
80 leukemia rarely, with long latency and low penetrance, with no significant effects on overall  
81 survival (Fig. S1g). In contrast, combination of *Idh1*<sup>R132H</sup> with other leukemogenic  
82 mutations, namely *NRas* and *Npm1c* (triple-mutant), results in short-latency high-penetrance  
83 leukemia development (Fig. S1g), confirming the pre-leukemic nature of the *Idh1*<sup>R132H</sup>  
84 model. Accordingly, triple-mutant BM cells, but not cells with *Idh1*<sup>R132H</sup> alone, have enhanced  
85 colony-forming cell (CFC) assay replating ability, an *in vitro* measure of  
86 transformation (Fig. S1h). Comparison of RNA-sequencing from triple-mutant leukemias vs  
87 triple-mutant pre-leukemias, or vs *Idh1*<sup>R132H</sup> alone, revealed a gene signature which was  
88 specific to the leukemia state, and in which down-regulated genes were enriched  
89 for *Kat2a* chromatin targets (Fig. S1i). This association suggests that loss of *Kat2a* activity  
90 may contribute to progression of pre-leukemia to overt AML.

91

92 To investigate this putative contribution of *Kat2a* loss to pre-leukemia progression, we  
93 crossed conditional *Idh1*<sup>R132H</sup> and *Kat2a*<sup>Flox/Flox</sup> mice, into the *Mx1-Cre* background (Fig. 1a), to  
94 generate *Idh1*<sup>R132H</sup> animals that were heterozygous (HET) or NULL for *Kat2a* (Fig. S2a-  
95 b). We analyzed *Idh1*<sup>R132H</sup> *Kat2a*<sup>Flox/WT</sup> (*Idh*<sup>mut</sup> *Kat2a*<sup>HET</sup>) and  
96 *Idh1*<sup>R132H</sup> *Kat2a*<sup>Flox/Flox</sup> (*Idh*<sup>mut</sup> *Kat2a*<sup>NULL</sup>) animals 4 and 20 weeks after Cre induction, to  
97 identify early and progressed *Idh1*<sup>R132H</sup> pre-leukemia states. Analysis of BM stem and  
98 progenitor composition revealed no differences between genotypes or timepoints (Fig.S2c-  
99 g). We did not observe differences in spleen or liver pre-leukemia burden (Fig.S2h-  
100 i). However, *Idh*<sup>mut</sup> *Kat2a*<sup>NULL</sup> samples had a significant advantage in CFC re-plating in  
101 early pre-leukemia (4 weeks) (Fig.1b), which was not sustained at the 20-week timepoint.

Fig 1

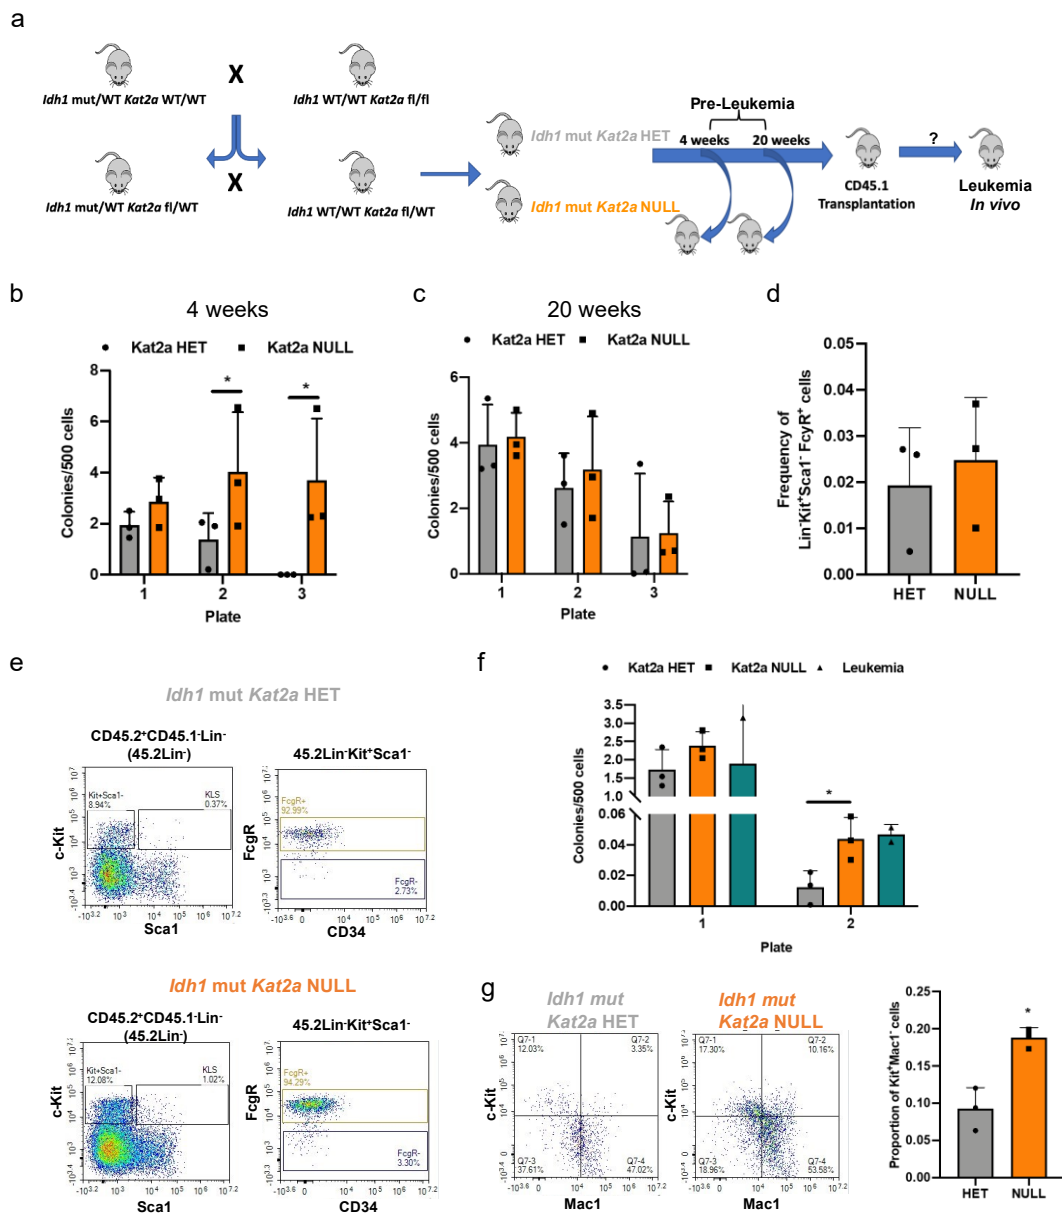

102

103

104

105

106

107

108

109

110

111

112

113

**Fig. 1: *Kat2a* loss facilitates development of *Idh1*<sup>R132H</sup> pre-leukemia.** (A) Diagram of *Idh1*<sup>R132H</sup> (*Idh1* mut) and *Kat2a*<sup>fl/fl</sup> mouse crosses to generate *Idh1* mut *Kat2a* HET and *Idh1* mut *Kat2a* NULL cells used in pre-leukemia studies. (B) Colony-forming cell (CFC) assays of *Idh1* mut *Kat2a* HET and NULL BM cells 4 weeks post-pIpC treatment; mean ± SD, n=3. (C) Colony-forming cell (CFC) assays of *Idh1* mut *Kat2a* HET and NULL BM cells 20 weeks post-pIpC treatment; mean ± SD, n=3. (D) Quantification of GMP-like BM cells obtained from *Idh1* mut CD45.2<sup>+</sup> grafts; mean ± SD, n=3 irradiated recipients (CD45.1). (E) Representative flow cytometry plots of BM cells in (D); top: *Idh1* mut *Kat2a* HET, bottom: *Idh1* mut *Kat2a* NULL. (F) Serial re-plating CFC assays of *Idh1* mut BM grafts. Mean ± SD, n=3 *Idh1* mut *Kat2a* HET and NULL, n=2 *Idh1* mut leukemia. (G) Flow cytometry of colonies in (F), Left, representative plots; right, Kit<sup>+</sup>Mac1<sup>-</sup> progenitor quantification. Mean ± SD, n=3. All analyses 2-tailed t-test; significant \*p<0.05.

114 This could be compatible with earlier selection of pre-leukemia cells upon *Kat2a* loss, which  
115 is achieved later in *Idh<sup>mut</sup> Kat2a<sup>HET</sup>* animals as the *Idh<sup>mut</sup>* phenotype progresses (Fig. 1c).  
116 In an attempt to understand whether the early replating advantage *in vitro* could lead to  
117 accelerated leukemia development *in vivo* in the absence of other genetic events, we  
118 transplanted BM cells from *Idh<sup>mut</sup> Kat2a<sup>HET</sup>* and *Idh<sup>mut</sup> Kat2a<sup>NULL</sup>* mice, into irradiated  
119 CD45.1 recipients and followed them up for 1 year. Similar to single *Idh<sup>mut</sup>* animals, we  
120 could not detect signs of leukemia development in transplanted mice (Fig. S3a). Transplants  
121 showed accumulation of GMP-like (Lin-Kit<sup>+</sup>Sca1<sup>+</sup>FcγR<sup>+</sup>) donor cells, compatible  
122 with myeloproliferation (Fig. 1d-e), which was identical between genotypes. Peripheral blood  
123 counts (Fig.S3b-d) and spleen and liver weights (Fig.S3e-f) were also similar. However, we  
124 observed infiltration of spleen and liver in 1 of 3 *Idh<sup>mut</sup> Kat2a<sup>NULL</sup>* recipients, which was  
125 not present in *Idh<sup>mut</sup> Kat2a<sup>HET</sup>* grafts (Fig.S3g). Notably, *Idh<sup>mut</sup> Kat2a<sup>NULL</sup>* cells showed  
126 enhanced colony-replating potential relative to *Idh<sup>mut</sup> Kat2a<sup>HET</sup>*, which was comparable to  
127 that of BM from rare *Idh<sup>mut</sup>* leukemic animals (Fig. 1f). *Idh<sup>mut</sup> Kat2a<sup>NULL</sup>* cells in CFC  
128 assays were enriched in c-Kit<sup>+</sup>Mac1<sup>-</sup> cells (Fig. 1g) compatible with hindered differentiation  
129 and/or expansion of self-renewing cells. Overall, the results suggest that loss  
130 of *Kat2a* imparts leukemogenic properties to *Idh<sup>mut</sup>* cells but is in itself not sufficient to  
131 drive leukemogenesis in the absence of additional cooperating genetic events.

132

133 We next tested the impact of *Kat2a* loss on the pre-leukemia model driven by the exon 9a  
134 splicing variant of the *RUNX1-RUNX1T1 (RT1(9a))* fusion gene, which when retrovirally-  
135 delivered to adult BM cells, leads to long-latency, incomplete-penetrance leukemia in  
136 irradiated recipients. Using our previously described *Kat2a<sup>Flox/Flox</sup> Mx1-Cre* mice, we  
137 isolated progenitor-enriched BM cells after *pIpC*-induced locus excision (Fig. S4a),  
138 and delivered the RT1(9a) construct by retroviral transduction, as described<sup>17</sup>. In all  
139 experiments, *Kat2a<sup>Flox/Flox</sup> Mx1-Cre<sup>+/-</sup> (Kat2a<sup>NULL</sup>)* were compared with *Kat2a<sup>Flox/Flox</sup> Mx1-*  
140 *Cre<sup>-/-</sup> (Kat2a<sup>WT</sup>)* cells. We started by evaluating leukemia development after  
141 transplantation of RT1(9a) *Kat2a<sup>NULL</sup>* and *Kat2a<sup>WT</sup>* BM cells (Fig. 2a). Loss of *Kat2a* led  
142 to a dramatic decrease in survival of RT1(9a) recipient animals, compatible with accelerated  
143 leukemia progression (Fig. 2b). *Kat2a<sup>NULL</sup>* leukemias had a non-significant trend towards  
144 higher white blood cell counts (Fig. S4b-d) and spleen leukemia burden, with  
145 minimal infiltration of other organs (Fig. S4e-g). The surface phenotype of the  
146 leukemias was indistinguishable between genotypes (Fig. S4h). Analysis of early timepoints  
147 post-transplantation showed that RT1(9a) engraftment became quickly fixed in the absence

Fig 2

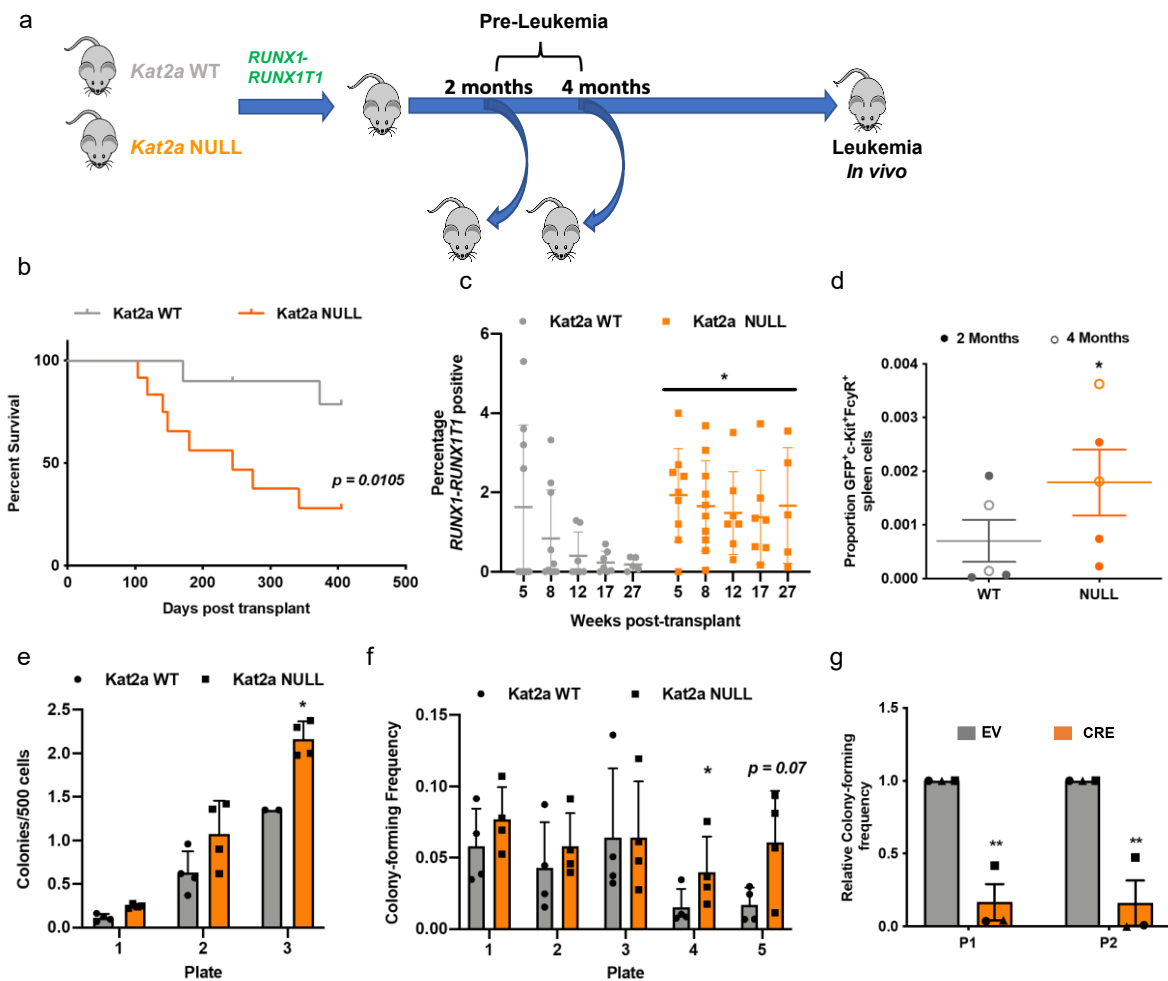

148

149 **Fig. 2: *Kat2a* loss accelerates *RT1(9a)* pre-leukemia to leukemia progression.** (A) Experimental design. (B)  
 150 Survival curve of *RT1(9a)* *Kat2a*WT and *Kat2a*NULL Kit<sup>+</sup> BM recipients; n=12 animals/genotype, \*p<0.05, log-rank  
 151 test. (C) Quantification of peripheral blood GFP for animals in (A); GFP reports *RT1(9a)*. Mean ± SD, n=10  
 152 animals/genotype (8 weeks), \*p<0.05, 2-way ANOVA. (D) CFC assay of *RT1(9a)* *Kat2a*WT and *Kat2a*NULL graft  
 153 BM cells 4 months post-transplantation; mean ± SD, n=4. (E) Flow cytometry analysis of *RT1(9a)* *Kat2a*WT and  
 154 *Kat2a*NULL graft spleen cells 2- and 4-months post-transplantation; mean ± SD, n=5. (F) *In vitro* transformation of  
 155 *Kat2a*WT and *Kat2a*NULL Lin<sup>-</sup>/Kit<sup>+</sup> BM cells transduced with *RT1(9a)* retrovirus tested in CFC serial re-plating;  
 156 mean ± SD, n=4. (G) CFC re-plating (plate=P1, P2) analysis of *RT1(9a)* *Kat2a*<sup>Flox/Flox</sup> Cre<sup>-/-</sup> Kit<sup>+</sup>/Lin<sup>-</sup> BM cells excised  
 157 *in vitro* by lentiviral-delivered *Cre* recombinase (vs. EV, empty vector) after 3 rounds of colony re-plating. Mean ±  
 158 SD, n=3. All other analyses 2-tailed t-test, \*p<0.05, \*\*p<0.01.

159

160

161 of *Kat2a* (Fig. 2c). *Kat2a*NULL/*RT1(9a)* cells obtained from healthy pre-  
 162 symptomatic recipients were enriched for GMP-like cells (Fig. 2d), and displayed enhanced  
 163 colony formation (Fig. 2e), compatible with accelerated pre-leukemia

164 development. Similarly, *Kat2a**NULL* cells directly tested in CFC assays upon retroviral  
165 transduction, displayed enhanced re-plating potential. (Fig. 2f). In contrast, excision  
166 of *Kat2a* in RT1(9a) cells post-*in vitro* transformation by 3 rounds of serial-replating, led to a  
167 reduction in colony formation (Fig. 2g), suggesting that *Kat2a* loss favors leukemia  
168 development only at a pre-leukemia stage. These observations mirror our previously  
169 identified role for *Kat2a* in maintenance of established leukemia stem-like cells and suggest  
170 that *Kat2a* plays stage-specific roles during leukemogenesis, which are preserved across  
171 leukemia models.

172

173 We had previously associated *Kat2a* function in leukemia stem cell maintenance with  
174 stability of transcriptional programs<sup>12</sup>. Using single-cell RNA-sequencing (scRNA-seq), we  
175 showed that *Kat2a* loss resulted in diversification and branching of differentiation  
176 trajectories, and associated with enhanced transcriptional noise, particularly in  
177 biosynthetic programs (e.g., ribosomal biogenesis and translation). We asked if similar  
178 mechanisms were at play in pre-leukemia progression facilitated by *Kat2a* loss. We  
179 hypothesized that enhanced transcriptional variability leading to program  
180 diversification might increase the probability of accessing or seeding leukemia  
181 programs, resulting in the observed acceleration in leukemia  
182 progression. We performed scRNA-seq analysis of pre-leukemia cells on the 10X platform,  
183 comparing transcriptional landscapes of *Kat2a**NULL* and *Kat2a**WT* RT1(9a) asymptomatic  
184 animals obtained 2 and 4 month post-transplantation. We sequenced a total of 1767 cells  
185 sorted as RT1(9a)/GFP<sup>+</sup> Kit<sup>+</sup> stem/progenitor and retrieved an average of 174770 aligned  
186 reads per cell, corresponding to medians of 5939 Unique Molecular Identifiers (UMI) and  
187 1575 genes per cell (Supplementary File 1). Less than 0.2% of reads aligned to mitochondrial  
188 DNA, denoting successful sequencing. Pre-processing steps are detailed in Supplementary  
189 Methods.

190

191 We employed transcripts of cell surface markers routinely used for hematopoietic cell  
192 immunophenotyping to map the identity of cells along the pseudo-temporal trajectories  
193 (Fig. S5a-b). Cells at the origin of the trajectory expressed high *Ly6e* (*Scal*), *Cd34* and *Flt3*,  
194 compatible with lymphoid-myeloid-primed progenitors (LMPP). LMPPs were adjacent to  
195 a granulocyte-monocyte progenitor (GMP)-like state (*Ly6e*<sup>low</sup>*Cd34*<sup>+</sup>*Fcgr3*<sup>+</sup>). Trajectories  
196 involved 3 additional states: *Ly6e*<sup>+</sup> *CD79a*<sup>+</sup> *Cd14*<sup>-</sup> B-cell affiliated Progenitor (BAP)  
197 (Supplementary File 3), and *Ly6e*<sup>+</sup>*Fcgr3*<sup>+</sup>*Cd14*<sup>+</sup> Monocyte-affiliated Progenitor (MAP)

Fig 3

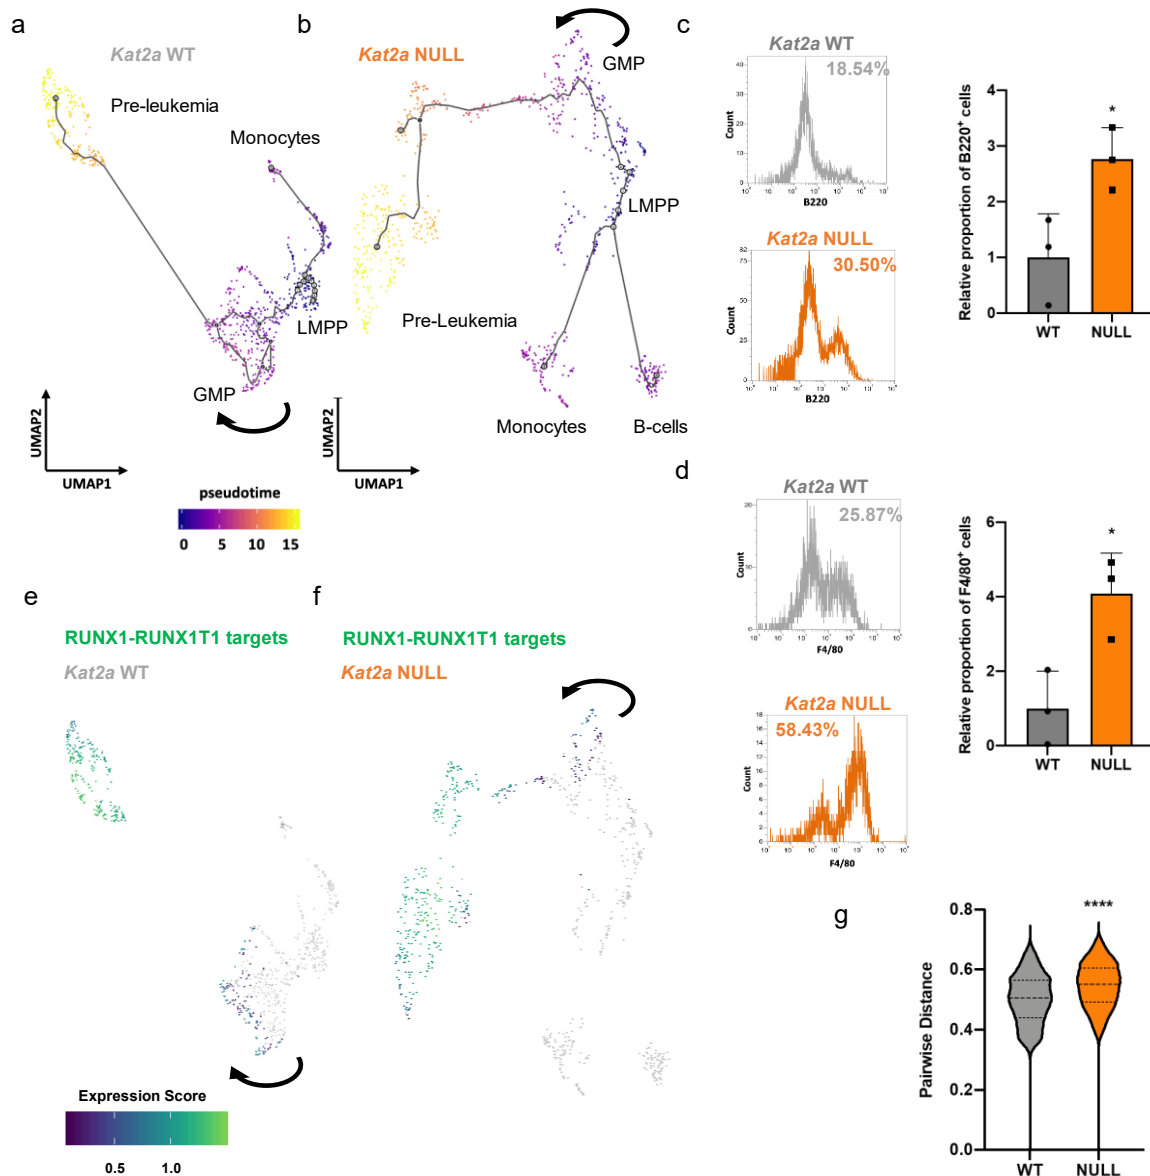

198

199

200 **Fig. 3: Loss of *Kat2a* diversifies cell fates and promotes RT1(9a) pre-leukemia progression.** (A-B) Pseudotime  
 201 single-cell trajectory of (A) *Kat2a*WT cells, (B) *Kat2a*NULL RT1(9a) cells 2 and 4 months after transplantation.  
 202 Trajectories inferred using Monocle3<sup>21</sup>; compartments labelled as per hematopoietic markers in Fig. S5A- B. Arrows  
 203 denote pseudotime progression. (C) B220 B-cell marker in plate 2 CFC of RT1(9a)-transduced *Kat2a*WT and  
 204 *Kat2a*NULL cells during *in vitro* transformation; mean  $\pm$  SD, n=3. (D) F4/80 monocyte marker in plate 2 CFC of  
 205 RT1(9a)-transduced *Kat2a*WT and *Kat2a*NULL cells during *in vitro* transformation; mean  $\pm$  SD, n=3. (E-F)  
 206 Expression of *RUNX1-RUNX1T1* ChIP-seq targets<sup>18</sup> in (E) *Kat2a*WT cells and (F) *Kat2a*NULL RT1(9a) single-cell  
 207 trajectories. Arrows as in A-B. (G) Pairwise distance transcriptional variability measure<sup>19</sup> of *Kat2a*WT and  
 208 *Kat2a*NULL RT1(9a) cells; top 500 most variable genes/genotype calculated by distance to the median CV (DM);  
 209 \*\*\*\*p-adj<0.0001. All analyses 2-tailed t-test, \*p<0.05.



210 (Supplementary File 4), confirmed by gene ontology (GO) analysis (Fig. S5c-d); and a third  
211 compartment in direct proximity of the GMP, characterized as  $Ly6e^+Fcgr3^+Cd33^+Cd14^+$ ,  
212 with no  $Cd34$  or  $Cd48$ . BAP was exclusive to  $Kat2a$ NULL samples, while MAP was  
213 common to both genotypes, albeit enriched in  $Kat2a$ NULL samples (Fig. S5e). We  
214 confirmed enhanced phenotypic differentiation of  $Kat2a$ NULL RT1(9a) cells to the B (Fig.  
215 3c) and macrophage (Fig. 3d) lineages *in vitro*. Using a signature of RT1 chromatin targets<sup>18</sup>,  
216 we identified the third compartment as the candidate pre-leukemia progenitor (PLP)  
217 population (Fig. 3e-f). PLPs form a discrete (Fig. 3e) and relatively smaller  
218 (Fig. S5e) compartment in the  $Kat2a$ WT trajectory; in contrast, the GMP-to-PLP transition  
219 is more densely populated in  $Kat2a$ NULL pre-leukemia (Fig. 3f), with PLP comprising a  
220 larger number of NULL cells. (Fig. S5e). Overall, the pseudo-temporal trajectories support  
221 the notion of increased cell diversification through  $Kat2a$  loss, with additional cell states  
222 (BAP) and, importantly, increased size of the PLP compartment. Comparative analyses of 2  
223 and 4-month pre-leukemia samples confirm the pseudo-temporal trajectory  
224 findings:  $Kat2a$ WT RT1(9a) cells progressively differentiate from LMPP to GMP-like  
225 cells (Fig. S5f) and accumulate PLPs. Pre-leukemia progression is accelerated  
226 in  $Kat2a$ NULL RT1(9a) (Fig. S5f), which contain nearly 50% of PLPs at 4 months,  
227 and uniquely display 27% of BAP cells at 2 months (Fig. S5f). The increased diversification  
228 of cell types in  $Kat2a$  NULL samples translated in enhanced cell-to-cell transcriptional  
229 variability, measured by pairwise distance<sup>19</sup> (Fig. 3g, S6a).  $Kat2a$ NULL transcriptional  
230 programs were also more variable within individual cell sub-populations (Fig. S6b),  
231 indicating that the variability is likely to at least in part reflect transcriptional noise, rather  
232 than differences in cellular composition alone. Comparison of transcriptional  
233 variability between  $Kat2a$  WT and NULL cell subpopulations shows that the GMP to PLP  
234 transition itself is accompanied by enhanced transcriptional variability (Fig. S6b), supporting  
235 the notion that  $Kat2a$  loss may accelerate pre-leukemia progression through enhanced  
236 transcriptional noise.

237

238 In order to understand the nature of the transcriptional programs perturbed upon (1)  $Kat2a$   
239 loss, and (2) pre-leukemia progression, we performed differential gene expression analysis of  
240 the scRNA-seq dataset. Comparison of  $Kat2a$ NULL to WT cells revealed minimal changes in  
241 gene expression levels (Fig. S7a), which were of down-regulation, as previously observed  
242 upon  $Kat2a$  loss<sup>12</sup>. Consistent with our published data<sup>12</sup>, differentially-expressed genes  
243 between genotypes predominantly associated with ribosomal assembly and translation

Fig 4

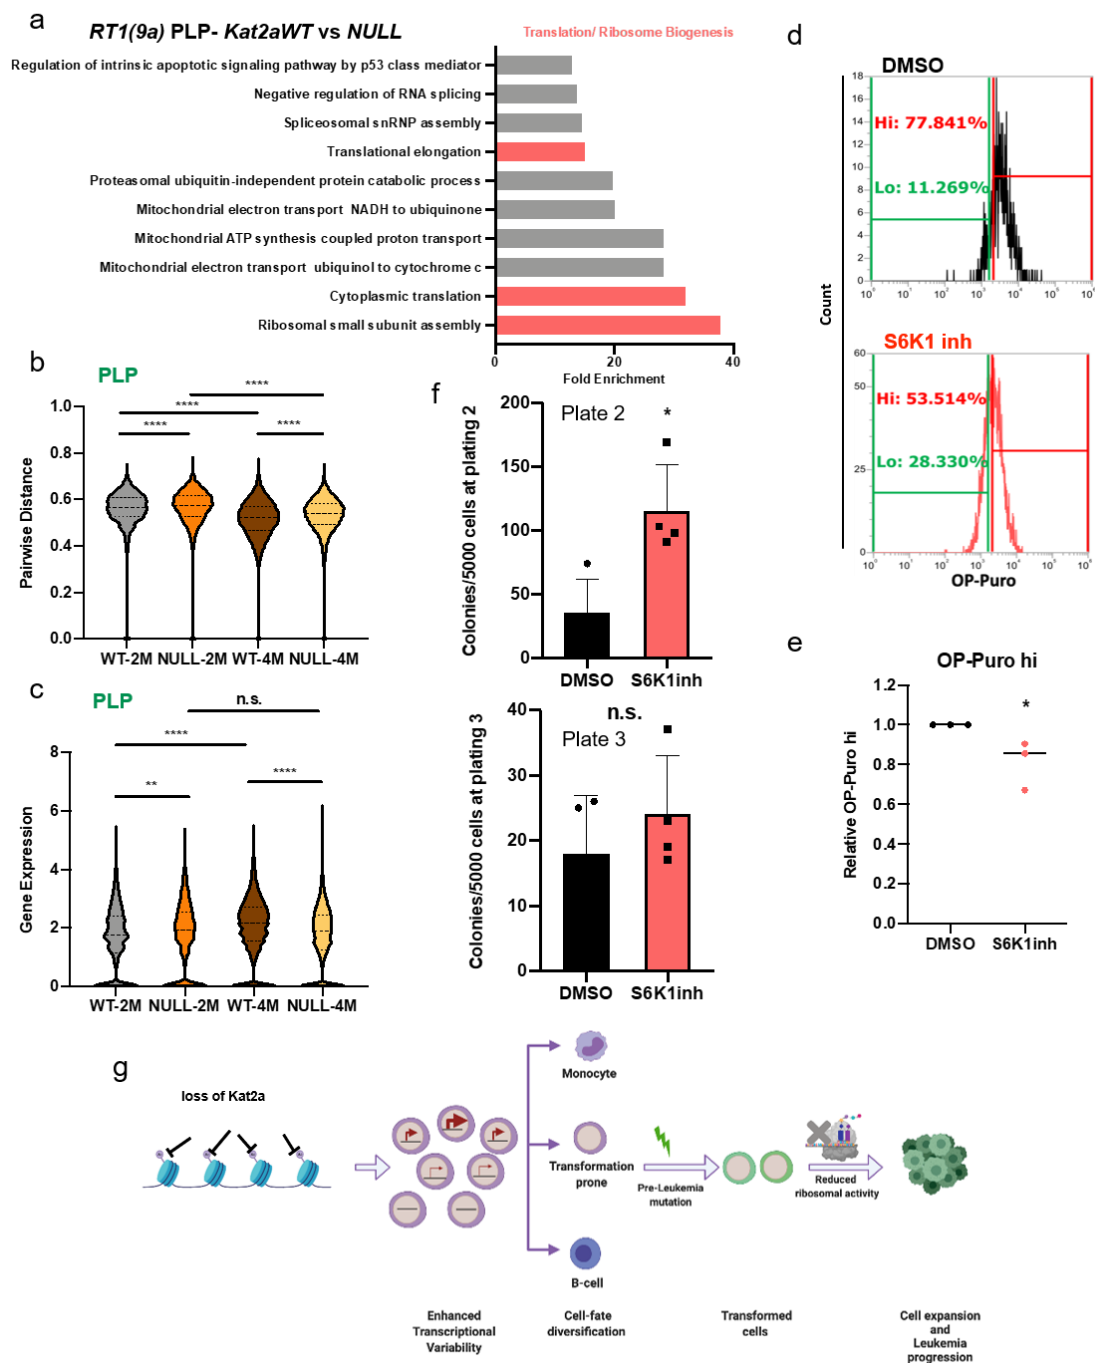

244

245 **Fig. 4: Inhibition of protein synthesis phenocopies effects of *Kat2a* loss facilitating pre-leukemia**

246 **transformation. (A)** Over-represented gene ontology categories (GO) for genes downregulated in RT1(9a)

247 *Kat2aNULL* vs. *WT PLP*; \*p-adj<0.05. **(B)** Pairwise distance<sup>19</sup> of RT1(9a) PLPs; comparisons consider correlations

248 between ribosomal biogenesis genes \*\*\*p-adj<0.0001, 2-tailed t-test. **(C)** Distribution of expression levels for gene

249 signatures in (B) \*\*\*p-adj<0.0001, 2-tailed t-test. **(D)** Representative OP-Puro incorporation flow cytometry of

250 S6K1inh-treated RT1(9a) *Kat2aWT* cells. **(E)** Quantification of OP-Puro high cells in (E), relative to DMSO; mean ±

251 SD, n=3, \*p<0.05, 2-tailed t-test. **(F)** CFC replating of *Kat2aWT* RT1(9a) *in vitro* transformation in the presence of

252 S6K1inh (control, DMSO). Plate 2 (left); mean ± SD, n=4, \*p<0.05. Plate 3 (right); mean ± SD, n=4, n.s.; 2-tailed t-

253 test. **(G)** Proposed mode of action of *Kat2a* loss in pre-leukemia progression.

254 ontologies (Fig. S7b) (Supplementary File 5), a pattern particularly prominent within  
255 PLP (Fig. 4a) (Supplementary File 6). The same ontologies were specifically down-  
256 regulated in *Kat2a*WT RT1(9a) PLPs compared to other cell states (Fig. S7c) (Supplementary  
257 File 7), capturing a reported decrease in protein synthesis in RT1 leukemia<sup>20</sup>. Ribosomal and  
258 translation ontologies (Fig. S7d-e) (Supplementary File 8) were also down-regulated  
259 in *Idh1*<sup>R132H</sup> mice upon pre-leukemia-to-AML progression through additional genetic  
260 mutations. Altogether, our findings suggest a specific association of attenuated ribosomal  
261 programs with pre-leukemia progression, which may be further facilitated  
262 by *Kat2a* loss. *Kat2a* loss increases variability of ribosomal biogenesis programs in PLPs  
263 (Fig. 4b), themselves more variable than GMPs (Fig. S7f), suggesting enhanced noise at the  
264 transition (Supplementary File 9). The gene expression range in *Kat2a*NULL PLPs favors  
265 lower mean values (Fig. 4c). In support of the functional impact of the transcriptional  
266 perturbation, *Kat2a* loss results in decreased protein synthesis (Fig. S8a-b; also<sup>12</sup>).

267

268 We tested the contribution of reduced protein synthesis activity to pre-leukemia progression  
269 by treatment with the S6K1 inhibitor (S6K1inh) PF4708671 (Fig. S8c), which impairs  
270 protein synthesis activity confirmed by reduced OP-Puro incorporation in nascent peptide  
271 chains (Fig. 4d-e). We treated *Kat2a*WT RT1(9a) cells with S6K1inh and tested their  
272 leukemia transformation potential *in vitro* through CFC assay re-plating. S6K1-inhibited  
273 cells displayed enhanced colony-formation upon re-plating (Fig. 4f), suggesting a  
274 contribution to leukemia transformation. However, the increase in colony formation was  
275 transient and eventually lost upon subsequent re-plating (Fig. 4f). This suggests  
276 that the effects of reduced protein synthesis on leukemia cells may vary with progression of  
277 transformation, reconciling our data with prior analysis of established *MLL-AF9* cells, in  
278 which reduced OP-Puro incorporation associated with *Kat2a*NULL-mediated extinction of  
279 leukemia stem cells<sup>12</sup>. We observed a similar pattern of transient increase in colony  
280 formation of *Idh1*<sup>R132H</sup> pre-leukemia cells treated with S6K1inh (Fig. S8d). Altogether, the  
281 data suggest that reduced ribosomal assembly and protein synthesis facilitate pre-leukemia  
282 progression. Exploration of lower levels of expression of translation-associated genes as a  
283 consequence of enhanced transcriptional variability may be instrumental in the acceleration  
284 of pre-leukemia to AML transition upon *Kat2a* loss. As leukemia progresses, variability in  
285 ribosomal biosynthesis programs, may become attenuated with deviation from an optimal  
286 level no longer favorable to transformation.

287

288 In this report, we have shown that *Kat2a* loss facilitates pre-leukemia progression  
289 in *Idh1<sup>R132H</sup>* and *RUNX1-RUNX1T1(9a)* mouse models of human disease, with acceleration of  
290 frank leukemia onset in the case of RT1(9a). Loss of *Kat2a* resulted in enhanced variability  
291 of transcription, leading to diversification of cell fates, including accumulation of pre-  
292 leukemia progenitor cells. In the context of an early genetic event such  
293 as *RT1(9a)* or *Idh1<sup>R132H</sup>*, which do not allow for full leukemia transformation, the cellular  
294 heterogeneity that ensues creates the opportunity for specification and expansion of  
295 transformation-prone cells, on which additional molecular events may act to progress the  
296 leukemic process (Fig. 4g). Amongst these, we show that destabilization of translation, which  
297 is specifically targeted by *Kat2a*, acts to facilitate transformation. This may be achieved by  
298 surveying and selection of biosynthetically quiescent cell states, which evade further  
299 diversification and respond to additional mutations with disease propagation and progression.  
300 Fully transformed, well-adapted leukemia cells may buffer transcriptional variability to  
301 maintain stable self-renewal signatures and optimal biosynthetic, translation rates. In this  
302 context, instability of transcriptional programs may shift biosynthetic homeostasis and  
303 perturb cellular identity, and mal-adapt leukemia stem-like cells, with anti-leukemia effects.  
304 Thus, stage-specific tuning and untuning of transcription and translation may be employed to  
305 modulate cancer progression, a principle that can be extended to other cancer state transitions  
306 such as metastasis or drug-resistance with prognostic and therapeutic potential.

307

#### 308 **ACKNOWLEDGEMENTS:**

309 **FUNDING:** This study was funded by a Lady Tata Memorial Trust International PhD  
310 Scholarship to SG (2017-2021), a Kay Kendall Leukaemia Fund Intermediate Fellowship to  
311 CP (KKL888), and Cancer Research UK (C22324/A23015) and Wellcome Trust  
312 (WT098051) Senior Fellowships to GSV. CP was funded by a Leuka John Goldman  
313 Fellowship for Future Science (2017-2019), a Wellcome Trust / University of Cambridge  
314 ISSF Grant (2019) and a Start-up Grant from Brunel University London CHMLS (2019-  
315 2021). Work in GSV lab is also funded by the European Research Council, Kay Kendall  
316 Leukaemia Fund, Blood Cancer UK, and the Wellcome Trust. SG received partial PhD  
317 studentships from the Trinity Henry Barlow and the Cambridge Commonwealth, European  
318 and International Trusts, and additional support from Murray Edwards College and the  
319 University of Cambridge Lundgren Award.

320 **AUTHOR CONTRIBUTIONS:** Study conception – CP; Experimental design – SG, OD,  
321 GSV, CP; Data collection – SG, OD, AFD, OC, CC, GG, JR, JC, MG, RJA, NA, VH-H;

322 Data analysis and interpretation – SG, OD, AFD, OC, CC, GSV, CP; Critical reagents – SP,  
323 BJH; Writing – SG, CP, with contributions from OD, GSV. All Authors approved the final  
324 version of the manuscript.

325 The Authors would like to thank: Central Biomedical Services of the University of  
326 Cambridge for expert animal husbandry, CRUK Genomics Core Facility at the Cambridge  
327 Research Institute, and the Wellcome Trust Sanger Research Institute Genomics Core  
328 Facility for library preparation and next-generation sequencing; the Flow Cytometry facilities  
329 at the Cambridge Institute for Medical Research, the NIHR Cambridge BRC Cell  
330 Phenotyping Hub, and the Department of Pathology of the University of Cambridge (Dr  
331 Joana Cerveira) for cell sorting; Dr Roberto Bandiera for helpful discussions and reagent  
332 sharing; and Dr Matt Wayland for assistance with Cell Ranger installation and 10X  
333 Genomics data matrix generation.

334 **COMPETING INTERESTS:** VH-H is co-Founder and CSO of Axovia Therapeutics. SP is  
335 the CEO of NonExomics, Inc. Axovia and NonExomics did not provide funding to this study,  
336 and did not influence study design, execution, data analysis or interpretation.

337 **DATA AVAILABILITY:** Single-cell RNA sequencing and bulk RNA-sequencing data were  
338 deposited in ArrayExpress with accession number E-MTAB-10853 and ERP006862  
339 respectively.

340

## 341 **SUPPLEMENTARY MATERIALS**

342 Materials and Methods

343 Table S1-S3

344 Fig S1-S8

345 References 26-32

346 Supplementary Files S1-S9

347

## 348 **REFERENCES**

- 349 1. Greaves M, Maley CC. Clonal evolution in cancer. *Nature*. 2012;481(7381):306-313.  
350 doi:10.1038/nature10762
- 351 2. N M, C S. Biological and therapeutic impact of intratumor heterogeneity in cancer  
352 evolution. *Cancer Cell*. 2015;27(1):15-26. doi:10.1016/J.CCELL.2014.12.001
- 353 3. Zahir N, Sun R, Gallahan D, Gatenby RA, Curtis C. Characterizing the ecological and  
354 evolutionary dynamics of cancer. *Nat Genet* 2020 528. 2020;52(8):759-767.  
355 doi:10.1038/s41588-020-0668-4

- 356 4. Persi E, Wolf YI, Horn D, et al. Mutation–selection balance and compensatory  
357 mechanisms in tumour evolution. *Nat Rev Genet* 2020 224. 2020;22(4):251-262.  
358 doi:10.1038/s41576-020-00299-4
- 359 5. Landau DA, Clement K, Ziller MJ, et al. Locally Disordered Methylation Forms the  
360 Basis of Intratumor Methylome Variation in Chronic Lymphocytic Leukemia. *Cancer*  
361 *Cell*. 2014;26(6):813-825. doi:10.1016/j.ccell.2014.10.012
- 362 6. Pan H, Jiang Y, Boi M, et al. Epigenomic evolution in diffuse large B-cell lymphomas.  
363 *Nat Commun*. 2015;6. doi:10.1038/ncomms7921
- 364 7. TCGA. Genomic and Epigenomic Landscapes of Adult De Novo Acute Myeloid  
365 Leukemia. *N Engl J Med*. 2013;368(22):2059-2074. doi:10.1056/nejmoa1301689
- 366 8. Dawson MA, Prinjha RK, Dittman A, et al. Inhibition of BET recruitment to  
367 chromatin as an effective treatment for MLL-fusion leukaemia. *Nature*.  
368 2011;478(7370):529. doi:10.1038/NATURE10509
- 369 9. KM B, N Z, AU S, et al. MLL-rearranged leukemia is dependent on aberrant H3K79  
370 methylation by DOT1L. *Cancer Cell*. 2011;20(1):66-78.  
371 doi:10.1016/J.CCR.2011.06.010
- 372 10. Shlush LI, Zandi S, Mitchell A, et al. Identification of pre-leukaemic haematopoietic  
373 stem cells in acute leukaemia. *Nature*. 2014;506(7488):328-333.  
374 doi:10.1038/nature13038
- 375 11. Corces-Zimmerman MR, Hong WJ, Weissman IL, Medeiros BC, Majeti R.  
376 Preleukemic mutations in human acute myeloid leukemia affect epigenetic regulators  
377 and persist in remission. *Proc Natl Acad Sci U S A*. 2014;111(7):2548-2553.  
378 doi:10.1073/pnas.1324297111
- 379 12. Domingues AF, Kulkarni R, Giotopoulos G, et al. Loss of KAT2A enhances  
380 transcriptional noise and depletes acute myeloid leukemia stem-like cells. *Elife*.  
381 2020;9. doi:10.7554/eLife.51754
- 382 13. Tzelepis K, Koike-Yusa H, De Braekeleer E, et al. A CRISPR Dropout Screen  
383 Identifies Genetic Vulnerabilities and Therapeutic Targets in Acute Myeloid  
384 Leukemia. *Cell Rep*. 2016;17(4):1193-1205. doi:10.1016/j.celrep.2016.09.079
- 385 14. Moris N, Edri S, Seyres D, et al. Histone Acetyltransferase KAT2A Stabilizes  
386 Pluripotency with Control of Transcriptional Heterogeneity. *Stem Cells*.  
387 2018;36(12):1828-1838. doi:10.1002/stem.2919
- 388 15. Somervaille TCP, Cleary ML. Identification and characterization of leukemia stem  
389 cells in murine MLL-AF9 acute myeloid leukemia. *Cancer Cell*. 2006;10(4):257-268.

- 390 doi:10.1016/j.ccr.2006.08.020
- 391 16. Papaemmanuil E, Gerstung M, Bullinger L, et al. Genomic Classification and  
392 Prognosis in Acute Myeloid Leukemia. *N Engl J Med*. 2016;374(23):2209.  
393 doi:10.1056/NEJMOMA1516192
- 394 17. Basheer F, Giotopoulos G, Meduri E, et al. Contrasting requirements during disease  
395 evolution identify EZH2 as a therapeutic target in AML. *J Exp Med*. 2019;216(4):966-  
396 981. doi:10.1084/jem.20181276
- 397 18. Ptasinska A, Assi SA, Mannari D, et al. Depletion of RUNX1/ETO in t(8;21) AML  
398 cells leads to genome-wide changes in chromatin structure and transcription factor  
399 binding. *Leukemia*. 2012;26(8):1829-1841. doi:10.1038/leu.2012.49
- 400 19. Mohammed H, Hernando-Herraez I, Savino A, Nichols J, Marioni JC, Correspondence  
401 WR. Single-Cell Landscape of Transcriptional Heterogeneity and Cell Fate Decisions  
402 during Mouse Early Gastrulation. *CellReports*. 2017;20:1215-1228.  
403 doi:10.1016/j.celrep.2017.07.009
- 404 20. Cai X, Gao L, Teng L, et al. Runx1 Deficiency Decreases Ribosome Biogenesis and  
405 Confers Stress Resistance to Hematopoietic Stem and Progenitor Cells. *Cell Stem Cell*.  
406 2015;17(2):165-177. doi:10.1016/j.stem.2015.06.002
- 407 21. Trapnell C, Cacchiarelli D, Grimsby J, et al. The dynamics and regulators of cell fate  
408 decisions are revealed by pseudotemporal ordering of single cells. *Nat Biotechnol*.  
409 2014;32(4):381-386. doi:10.1038/nbt.2859
- 410 22. WC S, B R, AP W, et al. A conditional knockout resource for the genome-wide study  
411 of mouse gene function. *Nature*. 2011;474(7351):337-344.  
412 doi:10.1038/NATURE10163
- 413 23. Rodríguez CI, Buchholz F, Galloway J, et al. High-efficiency deleter mice show that  
414 FLPe is an alternative to Cre-loxP. *Nat Genet* 2000 252. 2000;25(2):139-140.  
415 doi:10.1038/75973
- 416 24. Dovey OM, Cooper JL, Mupo A, et al. Molecular synergy underlies the co-occurrence  
417 patterns and phenotype of NPM1-mutant acute myeloid leukemia. *Blood*.  
418 2017;130(17):1911-1922. doi:10.1182/BLOOD-2017-01-760595
- 419 25. Basheer F, Giotopoulos G, Meduri E, et al. Contrasting requirements during disease  
420 evolution identify EZH2 as a therapeutic target in AML. *J Exp Med*. 2019;216(4):966-  
421 981. doi:10.1084/jem.20181276
- 422
